# Supplementary material for: Supramolecular hydrogels of α-cyclodextrin/reverse poloxamines/carbon-based nanomaterials and its multi-functional application
Source: Royal Society of Chemistry journal article supplement (doi:10.1039/c5ra04351d), 2015-01-01
Supplement: c5ra04351d1.pdf [file c5ra04351d1.pdf]

**Supporting information**

Supramolecular Hydrogels of  $\alpha$ -cyclodextrin/Reverse  
poloxamines/Carbon-based Nanomaterials and Its Multi-functional  
Application

Jinglin Shen<sup>a</sup>, Guiying Xu<sup>a,b</sup>, Xia Xin<sup>a,b\*</sup>, Lin Wang<sup>a</sup>, Zhaohua Song<sup>a</sup>, Han Zhang<sup>a</sup>, Lu Tong<sup>a</sup>,  
Zewen Yang<sup>a</sup>

<sup>a</sup> *Key Laboratory of Colloid and Interface Chemistry (Shandong University), Ministry of Education, Shanda nanlu  
No. 27, Jinan, 250100, P. R. China*

<sup>b</sup> *National Engineering Technology Research Center for Colloidal Materials, Shandong University, Shanda nanlu  
No. 27, Jinan, 250100, P. R. China*

---

\* Author to whom correspondence should be addressed, E-mail: [xinx@sdu.edu.cn](mailto:xinx@sdu.edu.cn).

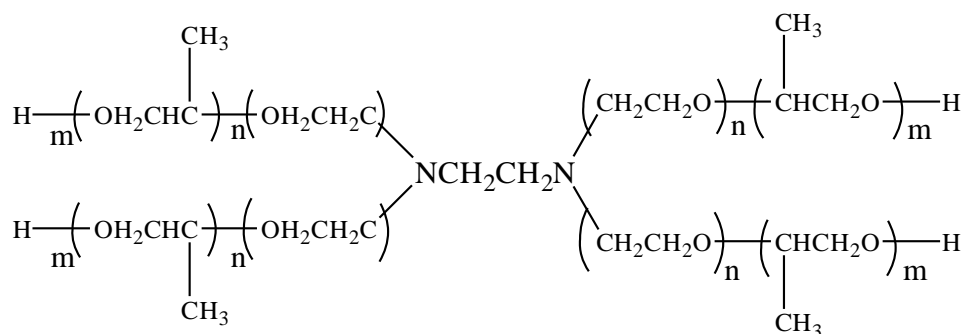

**Figure S1** The chemical structure of T90R4 ( $M_w=7200 \text{ g mol}^{-1}$ ,  $n=18$ ,  $m=16$ )

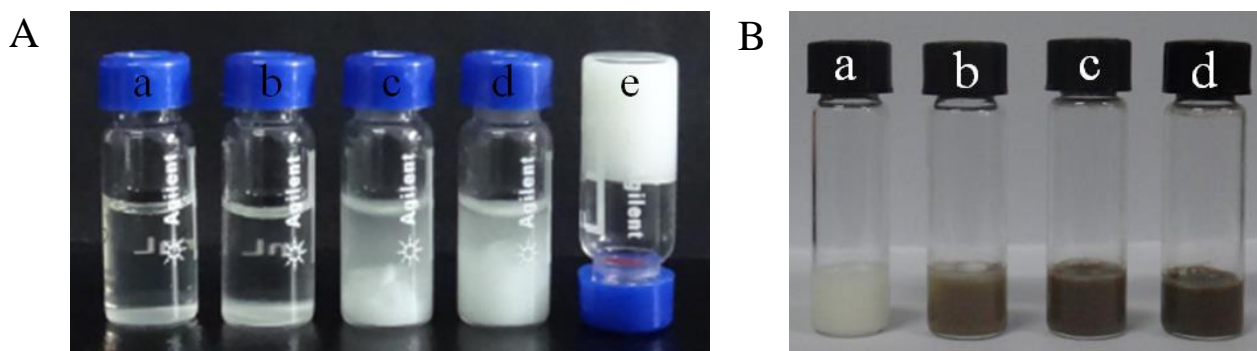

**Figure S2** (A) Photographs of five typical samples:  $50 \text{ mg mL}^{-1}$  T90R4 with varied  $\alpha$ -CD concentrations: (a) 60, (b) 80, (c) 100, (d) 120, (e)  $150 \text{ mg mL}^{-1}$ , respectively. The photos were taken after the samples were stored at  $20.0 \pm 0.1^\circ\text{C}$  for two weeks. (B) photographs of samples with the concentration of  $150 \text{ mg mL}^{-1}$   $\alpha$ -CD,  $50 \text{ mg mL}^{-1}$  T90R4, (a)  $0 \text{ mg mL}^{-1}$  GO, (b)  $1 \text{ mg mL}^{-1}$  GO, (c)  $3 \text{ mg mL}^{-1}$  GO, (d)  $5 \text{ mg mL}^{-1}$  GO.

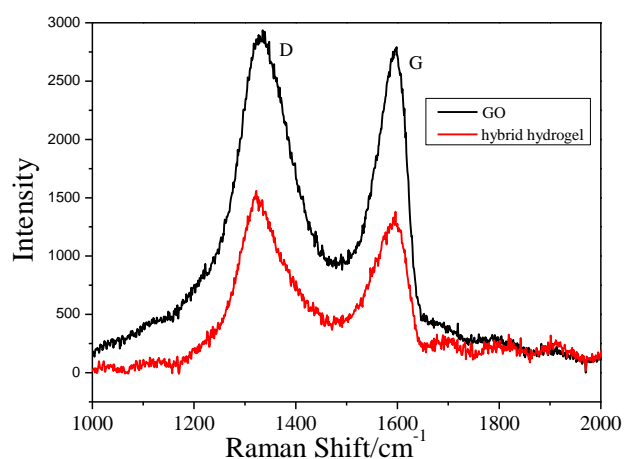

**Figure S3** Raman spectra excited at 633 nm of water-dispersed 5mg mL<sup>-1</sup> GO and hybrid hydrogel.

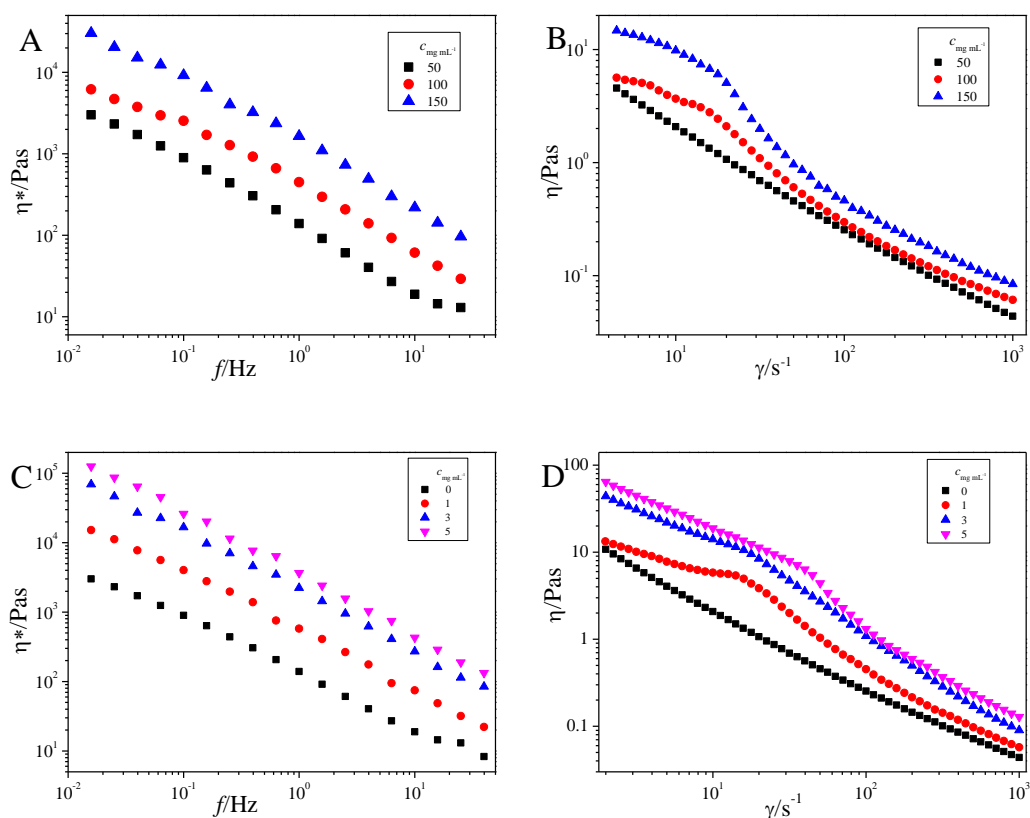

**Figure S4** Rheological results of hydrogel with different concentration of T90R4 and fixed concentration of  $\alpha$ -CD at 100mg mL<sup>-1</sup>: (A) variation of  $\eta^*$  as a function of frequency and (B) variation of shear viscosity as a function of shear rate. Rheological results of hydrogel with different concentration of GO at fixed concentration of  $\alpha$ -CD, T90R4 of 100 mg mL<sup>-1</sup>, 50 mg mL<sup>-1</sup>, respectively: (C) variation of  $\eta^*$  as a function of frequency and (D) variation of shear viscosity as a

function of shear rate.

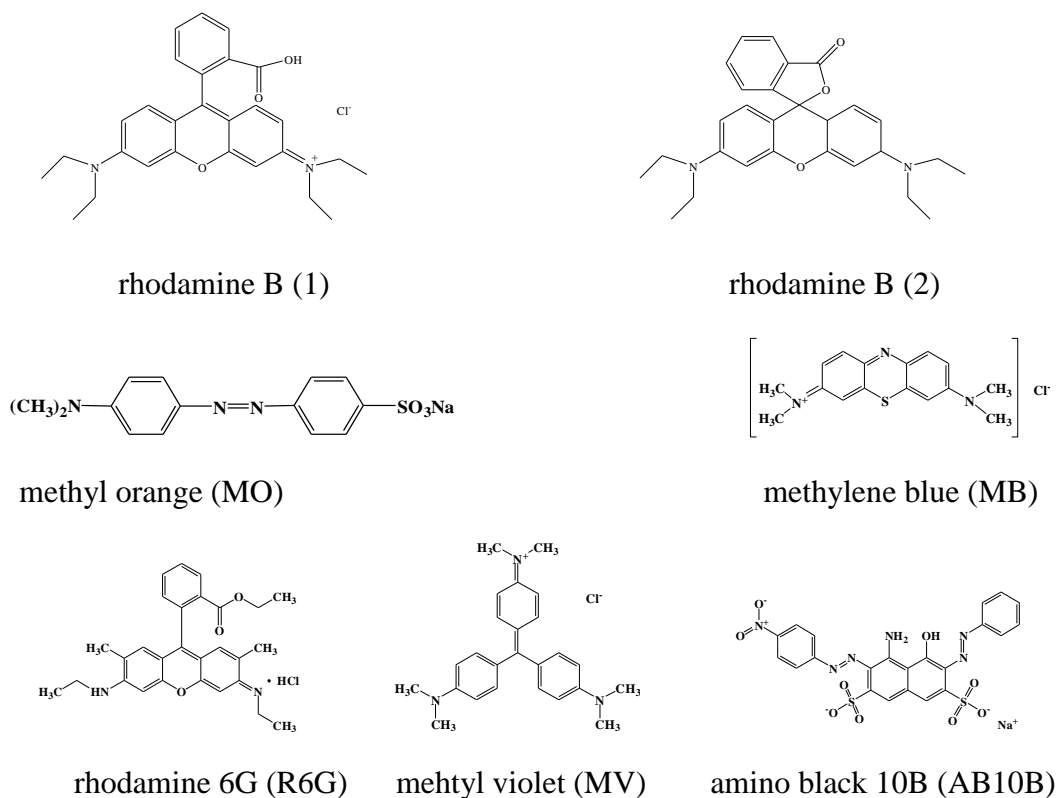

Figure S5 Structures of dyes.

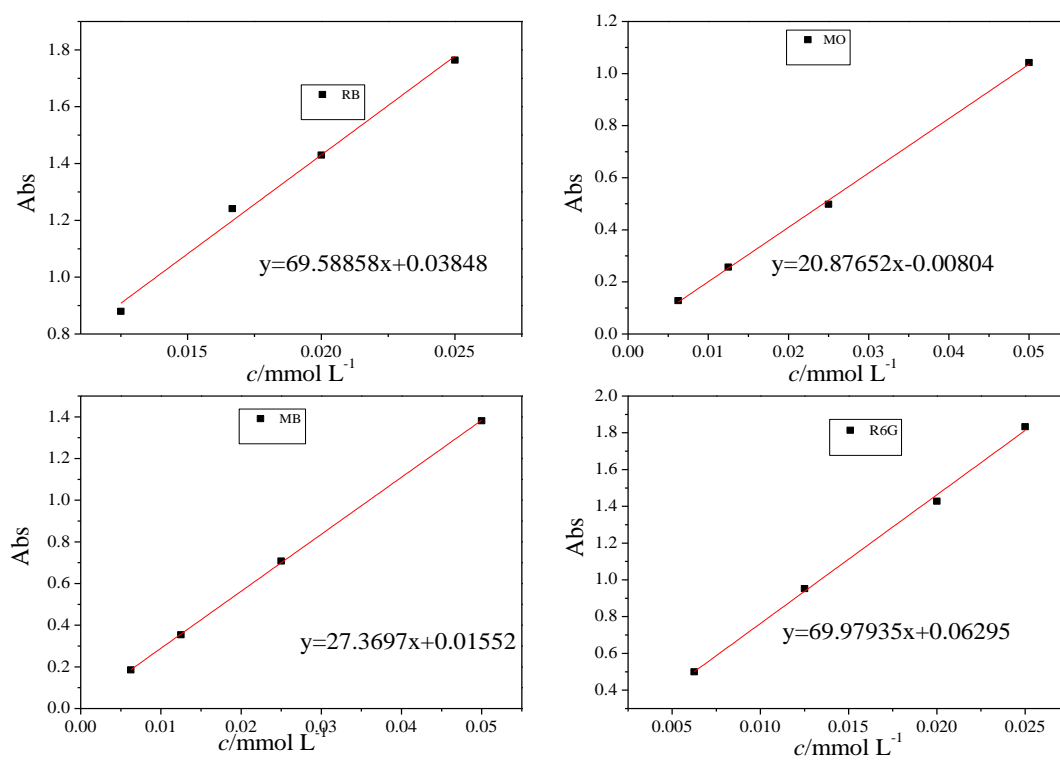

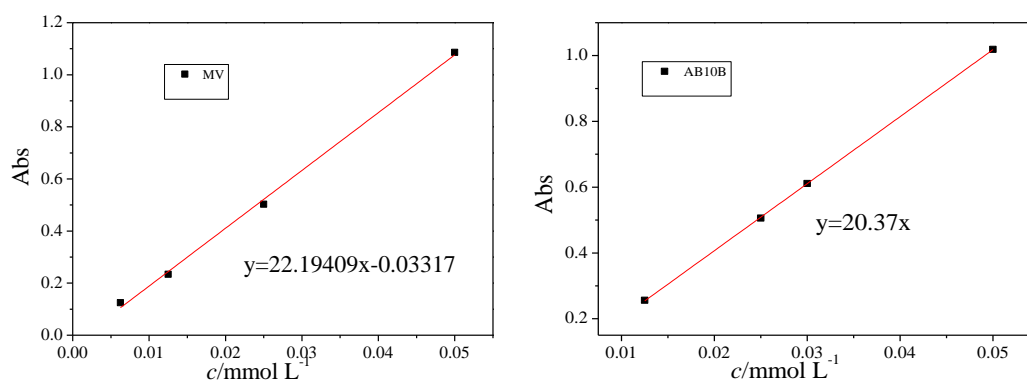

**Figure S6** Standard curve of dyes at  $\lambda_{\max}$

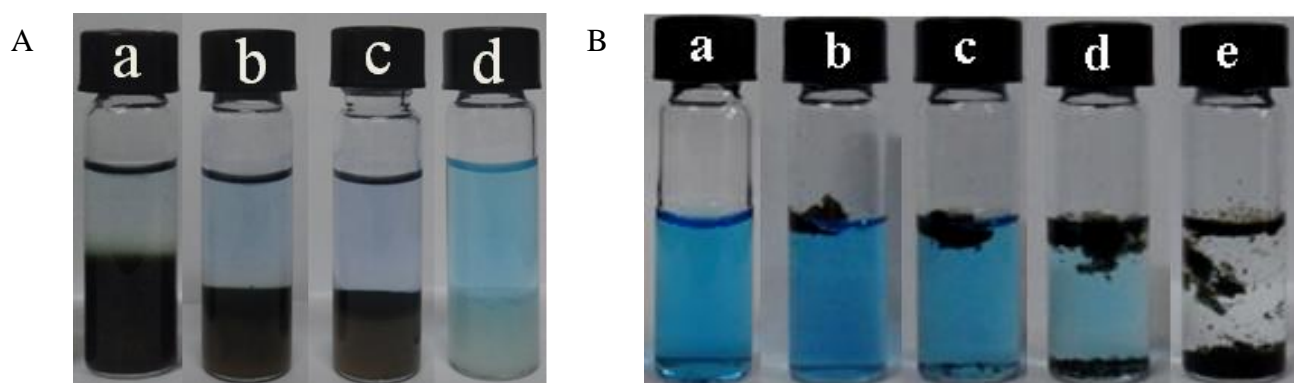

**Figure S7** (A) A final state of hydrogel containing (a) 5, (b) 3, (c) 1, (d) 0  $\text{mg mL}^{-1}$  GO after fully adsorption of MB. (B) The dye of MB solution and the freeze-dried samples of 5  $\text{mg mL}^{-1}$  GO before and after adsorption: (a) 0.05  $\text{mmole L}^{-1}$  MB; (b) 0 min; (c) 60 min; (d) 120 min; (e) 240 min.

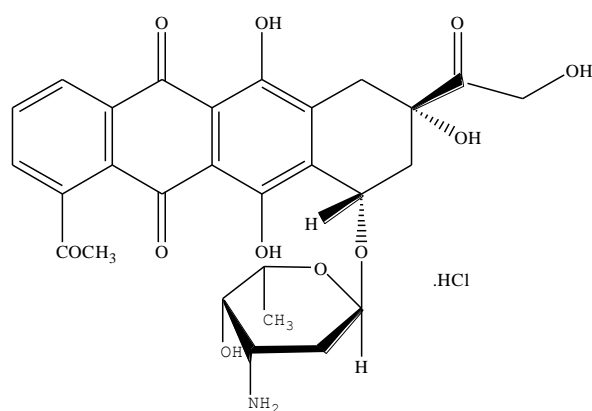

**Figure S8.** Structure of DOX

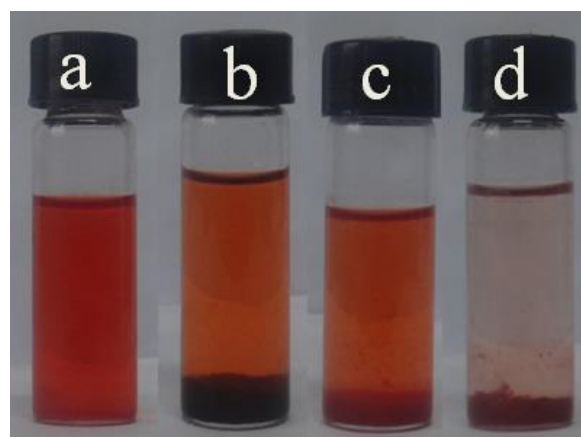

**Figure S9** Photographs of samples completely release of DOX after 50 h. (a)  $\alpha$ -CD, T90R4 of  $100 \text{ mg mL}^{-1}$ ,  $25 \text{ mg mL}^{-1}$  at  $\text{pH}=2$ , (b)  $\alpha$ -CD, T90R4 of  $100 \text{ mg mL}^{-1}$ ,  $25 \text{ mg mL}^{-1}$  and containing  $0.5 \text{ mg mL}^{-1}$  GO at  $\text{pH}=2$ , (c)  $\alpha$ -CD, T90R4 of  $100 \text{ mg mL}^{-1}$ ,  $25 \text{ mg mL}^{-1}$  at  $\text{pH}=5$ . (d)  $\alpha$ -CD, T90R4 of  $100 \text{ mg mL}^{-1}$ ,  $25 \text{ mg mL}^{-1}$  at  $\text{pH}=7.4$ .
